# THE AMERICAN JOURNAL OF PSYCHIATRY

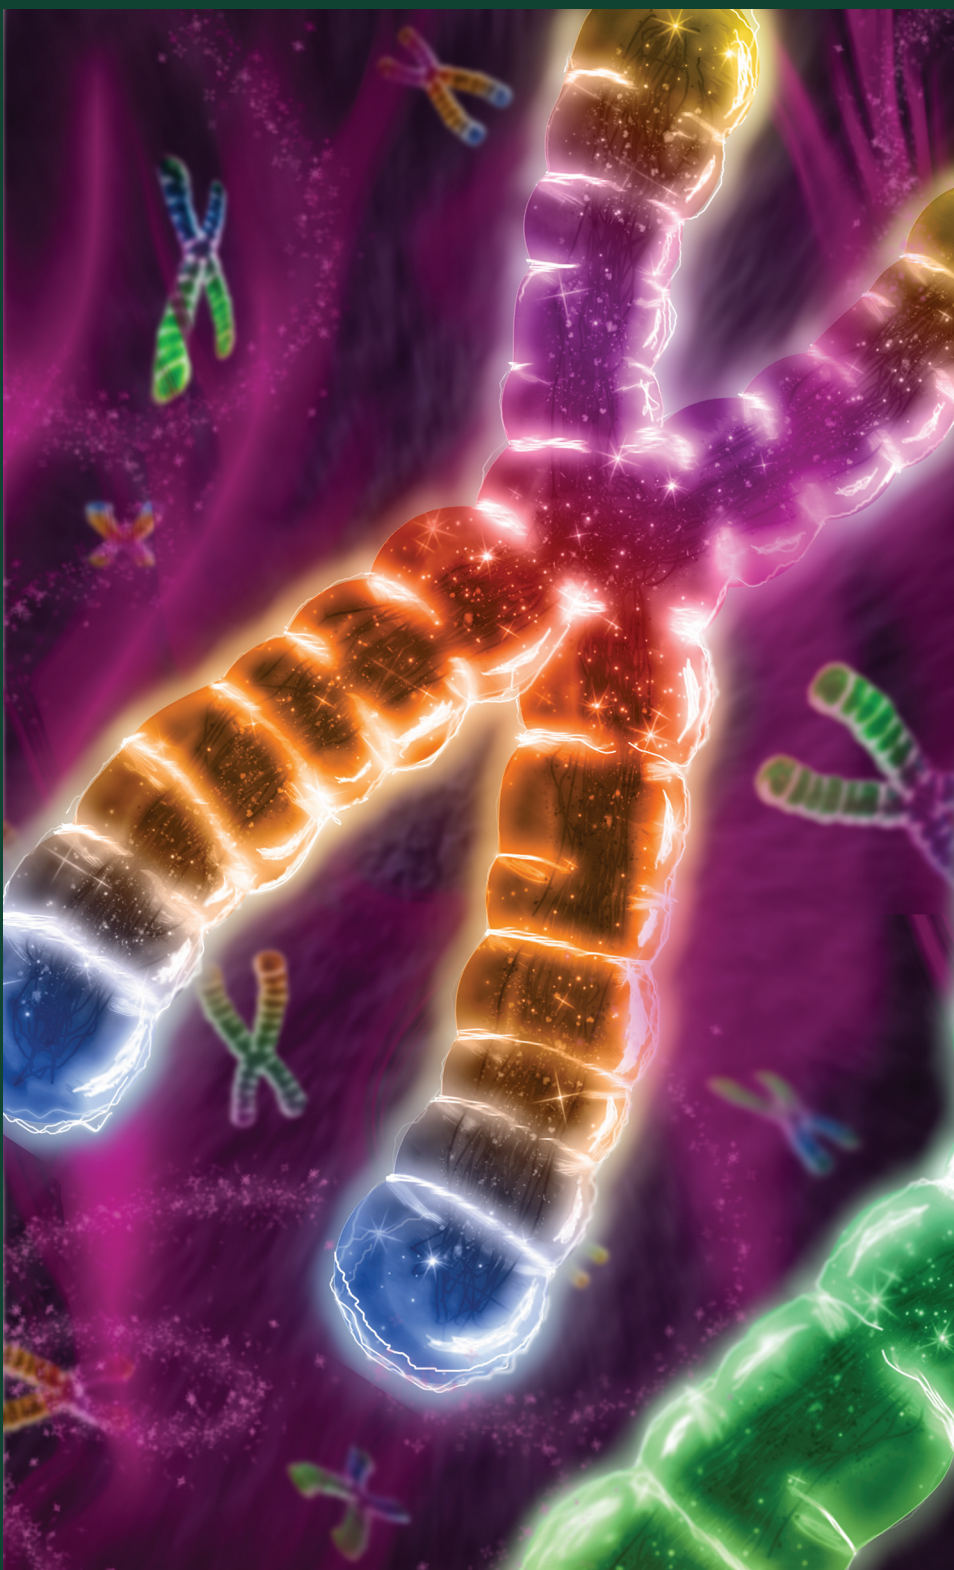

**The Conceptual Development  
of DSM-V**

Darrel Regier, M.D., M.P.H., et al. 645

**Depression and Cognitive  
Complaints Following Mild  
Traumatic Brain Injury**

Jonathan M. Silver, M.D., et al. 653

**Prenatal Exposure to Maternal  
Infection and Executive  
Dysfunction in Adult  
Schizophrenia**

Alan S. Brown, M.D., M.P.H., et al. 683

◀ **A Genomewide Association Study  
of Response to Lithium for  
Prevention of Recurrence in  
Bipolar Disorder**

Roy H. Perlis, M.D. M.Sc., et al. 718

**Continuing Medical Education 739**

**June 2009**

**Volume 166 • Number 6**

Official Journal of the  
AMERICAN PSYCHIATRIC ASSOCIATION

[ajp.psychiatryonline.org](http://ajp.psychiatryonline.org)
