# THE AMERICAN JOURNAL OF PSYCHIATRY

## EDITOR-IN-CHIEF

Robert Freedman, M.D.

## DEPUTY EDITORS

David A. Lewis, M.D.

Robert Michels, M.D.

Daniel S. Pine, M.D.

Susan K. Schultz, M.D.

Carol A. Tamminga, M.D.

## EDITORIAL STAFF

### Editorial Director

Michael D. Roy

### Senior Editor/Features Writer

Jane Weaver, E.L.S.

### Senior Editors

John J. Guardiano, Ph.D.  
Leannah M. Harding, M.S., E.L.S.

### Production Manager

Julie C. Blair

### Graphic Designer

Steve Hennessey

### Assistant Editor

Angela Moore

### Editorial Support

Services Manager  
Kourtney Skinner

### Editorial Assistant

Samantha Luck

### Administrative Assistant

Victoria Chihos

### Assistants to the Editors

Lois Lilienthal  
Lindsay Karr  
Rachel Hogg  
Russell A. Scholl

## ASSOCIATE EDITORS

Kathleen T. Brady, M.D., Ph.D.

David A. Brent, M.D.

Linda Brzustowicz, M.D.

Cameron S. Carter, M.D.

Howard H. Goldman,  
M.D., Ph.D.

Daniel C. Javitt, M.D.

Bankole Johnson, M.D.

Ellen Leibenluft, M.D.

Jeffrey A. Lieberman, M.D.

Barbara Milrod, M.D.

Maria A. Oquendo, M.D.

Jerrold F. Rosenbaum, M.D.

A. John Rush, M.D.

Larry J. Siever, M.D.

Patricia Suppes, M.D., Ph.D.

Myrna M. Weissman, Ph.D.

## EDITORS EMERITUS

Nancy C. Andreasen,  
M.D., Ph.D.

## FORMER EDITORS

John C. Nemiah, M.D.  
1978-1993

Amariah Brigham, M.D.  
1844-1849

T. Romeyn Beck, M.D.  
1849-1854

John P. Gray, M.D.  
1854-1886

G. Alder Blumer, M.D.  
1886-1894

Richard Dewey, M.D.  
1894-1897

Henry M. Hurd, M.D.  
1897-1904

Edward N. Brush, M.D.  
1904-1931

Clarence B. Farrar, M.D.  
1931-1965

Francis J. Braceland, M.D.  
1965-1978

The American Journal of Psychiatry is online at [ajp.psychiatryonline.org](http://ajp.psychiatryonline.org)

# THE AMERICAN PSYCHIATRIC ASSOCIATION

1000 Wilson Blvd., Suite 1825, Arlington, VA 22209-3901  
(888) 357-7924 (toll-free inside the U.S. and Canada) / (703) 907-7300  
web site: [www.psych.org](http://www.psych.org) / e-mail: [apa@psych.org](mailto:apa@psych.org)

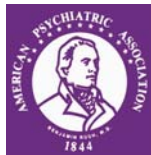

## OFFICERS 2008–2009

|                            |                                |
|----------------------------|--------------------------------|
| <b>President</b>           | Nada L. Stotland, M.D., M.P.H. |
| <b>President-Elect</b>     | Alan F. Schatzberg, M.D.       |
| <b>Vice-President</b>      | Carol A. Bernstein, M.D.       |
| <b>Secretary-Treasurer</b> | David Fassler, M.D.            |

## ASSEMBLY

|                      |                           |
|----------------------|---------------------------|
| <b>Speaker</b>       | Ronald M. Burd, M.D.      |
| <b>Speaker-Elect</b> | Gary S. Weinstein, M.D.   |
| <b>Recorder</b>      | Bruce A. Hershfield, M.D. |

## MEDICAL DIRECTOR'S OFFICE

|                                                                       |                                |
|-----------------------------------------------------------------------|--------------------------------|
| <b>Medical Director and CEO</b>                                       | James H. Scully, Jr., M.D.     |
| <b>Chief Executive Officer, American Psychiatric Publishing, Inc.</b> | Ronald E. McMillen             |
| <b>Executive Director, APIRE Division of Research</b>                 | Darrel A. Regier, M.D., M.P.H. |
| <b>Executive Director, American Psychiatric Foundation</b>            | Paul T. Burke                  |

## BOARD OF TRUSTEES

|                                 |                             |
|---------------------------------|-----------------------------|
| Thomas K. Ciesla, M.D.          | Pedro Ruiz, M.D.            |
| Mary Helen Davis, M.D.          | Steven S. Sharfstein, M.D.  |
| Melinda G. Fierros, M.D.        | Lauren M. Sitzer, M.D.      |
| Jeffrey L. Geller, M.D., M.P.H. | John Chapman Urbaitis, M.D. |
| Dilip V. Jeste, M.D.            | Amy M. Ursano, M.D.         |
| James E. Ninger, M.D.           | Sidney H. Weissman, M.D.    |
| Roger Peele, M.D.               | William M. Womack, M.D.     |
| Carolyn B. Robinowitz, M.D.     |                             |

## AMERICAN PSYCHIATRIC PUBLISHING, INC.

### BOARD OF DIRECTORS 2006–2009

|                            |                                      |
|----------------------------|--------------------------------------|
| <b>President and Chair</b> | Katharine Phillips, M.D.             |
| <b>Secretary</b>           | Donna M. Norris, M.D.                |
| <b>Treasurer</b>           | Joan A. Lang, M.D.                   |
| Dwight L. Evans, M.D.      | Pedro Ruiz, M.D.                     |
| John M. Oldham, M.D.       | Donna E. Stewart, M.D., F.R.C.P.(C.) |
| Laura W. Roberts, M.D.     |                                      |

### EX-OFFICIO MEMBERS

|                                              |                                |
|----------------------------------------------|--------------------------------|
| <b>APA President</b>                         | Nada L. Stotland, M.D., M.P.H. |
| <b>APA President-Elect</b>                   | Alan F. Schatzberg, M.D.       |
| <b>APA Secretary-Treasurer</b>               | David Fassler, M.D.            |
| <b>APA Medical Director and CEO</b>          | James H. Scully, Jr., M.D.     |
| <b>Editor-in-Chief, Psychiatric Services</b> | Howard Goldman, M.D.           |
| <b>Editor-in-Chief, Books</b>                | Robert E. Hales, M.D., M.B.A.  |

APA Officers and Chairpersons for 2009-2010 took office at the conclusion of the APA Annual Meeting after this issue went to press. The July issue of *The American Journal of Psychiatry* will feature these officeholders.

The American Journal of Psychiatry is online at [ajp.psychiatryonline.org](http://ajp.psychiatryonline.org)
