# Read *The American Journal of Psychiatry* Online

Activate your FREE online access—It's as easy as 1, 2, 3!

To begin activation, go to [ajp.psychiatryonline.org](http://ajp.psychiatryonline.org) and click **SUBSCRIBE**

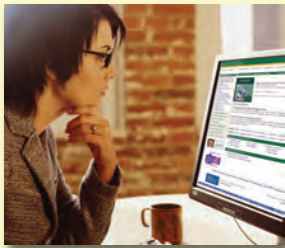

For APA Members and Other Individuals:

1. Click on **ACTIVATE** Your Member or Individual (Non-Member) Subscription
2. Locate your 10-digit Member/Customer Number\* on your journal mailing label above your name. Be sure to enter all 10 digits, including any leading zeros.
3. Enter your number in the box and click **SUBMIT**.

On the next screen, you'll register your subscription and create a username and password that can be used immediately to access your online subscription.

\*If you are an APA Member, in most cases the number on your label will be your Member Number; if it is not, please enter your APA Member Number (with enough leading zeros to create 10 digits) instead of the number on your mailing label.

For Institutions:

1. Click on **ACTIVATE** Your Institutional Subscription.
2. Locate your Customer Number on the journal mailing label above your name. Be sure to enter all 10-digits.
3. Enter your number in the box and click **SUBMIT**. On the next screen, you'll have the opportunity to enter IP addresses for your institution to provide seamless access for your patrons.

Member/Customer Number

AJP3000056866 CAR-RT LOT88 C-015  
John Q. Sample  
Mental Health Professional  
1000 Wilson Blvd STE 1825  
Arlington VA 22209-3924 01654

## Benefits of Online Activation

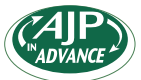

**AJP in Advance**—key research articles posted on the AJP website well in advance of their appearance in print.

**Back issue access to Volume 1, Issue 1**, starting with the *American Journal of Insanity* in 1844. (Available to institutions as a separate one-time purchase.)

**AJP CME**—interactive quizzes that offer *AMA PRA Category 1 Credits*™ for selected articles from each issue (with paid subscription to the CME Course Program).

**AJP Audio**—MP3-format program summarizing findings from key articles from each issue.

**Residents' Journal**—the gateway to AJP articles and features that have most value to residents in their training.

**Precise and powerful searching** by author, keyword, and/or citation details—within any one journal, across the entire PsychiatryOnline journal collection, or across all HighWire journals.

**PubMed, CrossRef, and Google Scholar links**—from cited references to abstracts and full text; to similar articles; to other articles by the same lead authors.

**eTOCs**—Get advance email alerts with the table of contents from the latest issue.

For more information or if you cannot locate your customer number, please contact APPI Customer Service:  
Call: 1.800.368.5777 or 703.907.7322  
Email: [appi@psych.org](mailto:appi@psych.org)

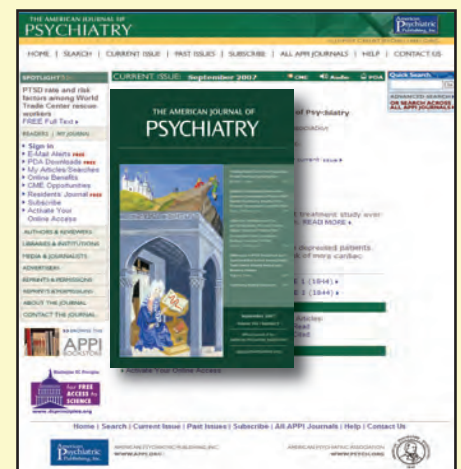

American  
**Psychiatric**  
Publishing, Inc.

The First and Last Word in Psychiatry

AH810

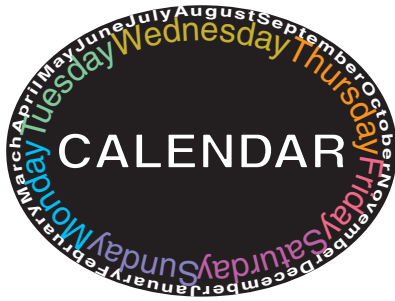

For free listing of your organization's official annual or regional meeting, please send us the following information: sponsor, location, inclusive dates, type and number of continuing education credits (if available), and the name, address, and telephone number of the person or group to contact for more information. In order for an event to appear in our listing, all notices and changes must be received at least 6 months in advance of the meeting and should be addressed to:

Calendar, American Journal of Psychiatry, 1000 Wilson Boulevard, Suite 1825, Arlington, VA 22209-3901, [jblair@psych.org](mailto:jblair@psych.org) (e-mail).

Because of space limitations, only listings of meetings of the greatest interest to Journal readers will be included.

## JUNE

**June 16–20**, 2nd Thematic Conference on Legal and Forensic Psychiatry, Madrid, Spain. Contact: World Psychiatric Association, Alfredo Calcedo Barba, forensicpsychiatry2009@gmail.com.

**June 25–27**, Eighth International Conference on Bipolar Disorder, Pittsburgh, PA. Contact: Maria Pena-Jordan, Conference Manager, [penajordanmi@upmc.edu](mailto:penajordanmi@upmc.edu) (e-mail), [www.8thbipolar.org](http://www.8thbipolar.org) (web site).

## AUGUST

**August 27–30**, Canadian Psychiatric Association 59th Annual Meeting, St. Johns, Newfoundland, Canada. Contact: 260-441 MacLaren Street, Ottawa, ON K2P 2H3, Canada; (800) 267-1555 (tel), (613) 234-9857 (fax), [conferene@cpa-apc.org](mailto:conferene@cpa-apc.org) (e-mail), [www.cpa-apc.org](http://www.cpa-apc.org) (web site).

## OCTOBER

**October 8–11**, 61st Institute on Psychiatric Services, American Psychiatric Association, New York, NY. Contact: Jill Gruber, APA Annual Meetings Dept., 1000 Wilson Blvd., Ste. 1825, Arlington, VA 22209; (703) 907-7815.

**October 27–November 1**, 56th Annual Meeting of the American Academy of Child and Adolescent Psychiatry, Honolulu, HI. Contact: AACAP, 3615 Wis-

consin Avenue, N.W., Washington, DC 20016-3007; (202) 966-7300 (tel), (202) 966-2891 (fax), [meetings@aacap.org](mailto:meetings@aacap.org) (e-mail), [www.aacap.org](http://www.aacap.org) (web site).

## NOVEMBER

**November 11–14**, 56th Annual Meeting, Academy of Psychosomatic Medicine, Las Vegas, Nev. Contact: [www.apm.org](http://www.apm.org) (web site).

## MARCH 2010

**March 17–20**, 21st Annual Meeting, American Neuropsychiatric Association, Tampa, Fla. Contact: [www.anpaonline.org](http://www.anpaonline.org) (web site).

## MAY

**May 22–27**, 163rd Annual Meeting of the American Psychiatric Association, New Orleans, LA. Contact: Cathy Nash, APA Annual Meetings Dept., 1000 Wilson Blvd., Ste. 1825, Arlington, VA 22209; (703) 907-7822.

## OCTOBER

**October 14–17**, 62nd Institute on Psychiatric Services, American Psychiatric Association, Boston, MA. Contact: Jill Gruber, APA Annual Meetings Dept., 1000

Wilson Blvd., Ste. 1825, Arlington, VA 22209; (703) 907-7815.

**October 26–31**, 57th Annual Meeting of the American Academy of Child and Adolescent Psychiatry, New York, NY. Contact: AACAP, 3615 Wisconsin Avenue, N.W., Washington, DC 20016-3007; (202) 966-7300 (tel), (202) 966-2891 (fax), [meetings@aacap.org](mailto:meetings@aacap.org) (e-mail), [www.aacap.org](http://www.aacap.org) (web site).

## MAY 2011

**May 14–19**, 164th Annual Meeting of the American Psychiatric Association, Honolulu, HI. Contact: Cathy Nash, APA Annual Meetings Dept., 1000 Wilson Blvd., Ste. 1825, Arlington, VA 22209; (703) 907-7822.

## OCTOBER

**October 18–23**, 58th Annual Meeting of the American Academy of Child and Adolescent Psychiatry, Toronto, Ontario. Contact: AACAP, 3615 Wisconsin Avenue, N.W., Washington, DC 20016-3007; (202) 966-7300 (tel), (202) 966-2891 (fax), [meetings@aacap.org](mailto:meetings@aacap.org) (e-mail), [www.aacap.org](http://www.aacap.org) (web site).

**October 27–30**, 63rd Institute on Psychiatric Services, American Psychiatric Association, San Francisco, CA. Contact: Jill Gruber, APA Annual Meetings Dept., 1000 Wilson Blvd., Ste. 1825, Arlington, VA 22209; (703) 907-7815.

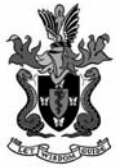

# THE BRITISH JOURNAL OF PSYCHIATRY

May 2009, VOL. 194

- A17 **Editorial Board**  
A19 **Highlights of this issue**
- Editorials**  
387 **Convulsive therapy turns 75**  
G. Gazdag, I. Bitter, G.S. Ungvari, and B. Baran  
389 **Accountability of specialist child and adolescent mental health services**  
E.M. Garralda  
391 **Themes: part 1 - 100 years ago**  
Henry R. Rollin
- Review article**  
392 **Family relationships in childhood and common psychiatric disorders in later life: systematic review of prospective studies**  
S. Weich, J. Patterson, R. Shaw, and S. Stewart-Brown  
398 **Brief reflection on the word Pain – poems by doctors**  
Miroslav Holub
- Papers**  
399 **Screening for depression in high-risk groups: prospective cohort study in general practice**  
K.D. Baas, K.A. Wittkamp, H.C. van Weert, P. Lucassen, J. Huyser, H. van den Hoogen, E. van de Lisdonk, P.E. Bindels, C.L. Bockting, H.G. Ruhé, and A.H. Schene  
404 **Issues concerning feedback about genetic testing and risk of depression**  
K. Wilhelm, B. Meiser, P.B. Mitchell, A.W. Finch, J.E. Siegel, G. Parker, and P.R. Schofield  
411 **Mental disorders and termination of education in high-income and low- and middle-income countries: epidemiological study**  
S. Lee, A. Tsang, J. Breslau, S. Aguilar-Gaxiola, M. Angermeyer, G. Borges, E. Bromet, R. Bruffaerts, G. de Girolamo, J. Fayyad, O. Gureje, J.M. Haro, N. Kawakami, D. Levinson, M.A. Oakley Browne, J. Ormel, J. Posada-Villa, D.R. Williams, and R.C. Kessler  
418 **Psychosis and autism: magnetic resonance imaging study of brain anatomy**  
F. Toal, O.J.N. Bloemen, Q. Deeley, N. Tunstall, E.M. Daly, L. Page, M.J. Brammer, K.C. Murphy, and D.G.M. Murphy
- 426 **Anterior cingulate cortex abnormalities associated with a first psychotic episode in bipolar disorder**  
A. Fornito, M. Yücel, S.J. Wood, A. Bechdolf, S. Carter, C. Adamson, D. Velakoulis, M.M. Saling, P.D. McGorry, and C. Pantelis  
434 **Metabolic profile of antipsychotic-naïve individuals with non-affective psychosis**  
E. Fernandez-Egea, M. Bernardo, T. Donner, I. Conget, E. Parellada, A. Justicia, E. Esmatjes, C. Garcia-Rizo, and B. Kirkpatrick  
439 **Cognitive effectiveness of olanzapine and risperidone in first-episode psychosis**  
M.J. Cuesta, E.G. de Jalón, M.S. Campos, and V. Peralta  
445 **Armadale (1866), Wilkie Collins – psychiatrists in 19th-century fiction**  
Fiona Subotsky  
446 **Development and implementation of early intervention services for young people with psychosis: case study**  
H. Lester, M. Birchwood, S. Bryan, E. England, H. Rogers and N. Sirvastava  
451 **Stalking among juveniles**  
R. Purcell, B. Moller, T. Flower, and P.E. Mullen  
456 **In-patient and residential alternatives to standard acute psychiatric wards in England**  
S. Johnson, H. Gilbert, B. Lloyd-Evans, D.P.J. Osborn, J. Boardman, M. Leese, G. Shepherd, G. Thornicroft, and M. Slade  
463 **Melancholia — in 100 words**  
Max Fink and Michael A. Taylor
- Short report**  
464 **Lithium levels in drinking water and risk of suicide**  
H. Ohgami, T. Terao, I. Shiotsuki, N. Ishii, and N. Iwata  
466 **Invited commentary on . . . Lithium levels in drinking water and reduced risk of suicide**  
A.H. Young
- Columns**  
467 **Correspondence**  
470 **Correction**  
471 **Book reviews**  
476 **Contents of *Advances in Psychiatric Treatment***  
477 **Contents of the *American Journal of Psychiatry***  
478 **From the Editor's desk**

# get CME from AJP

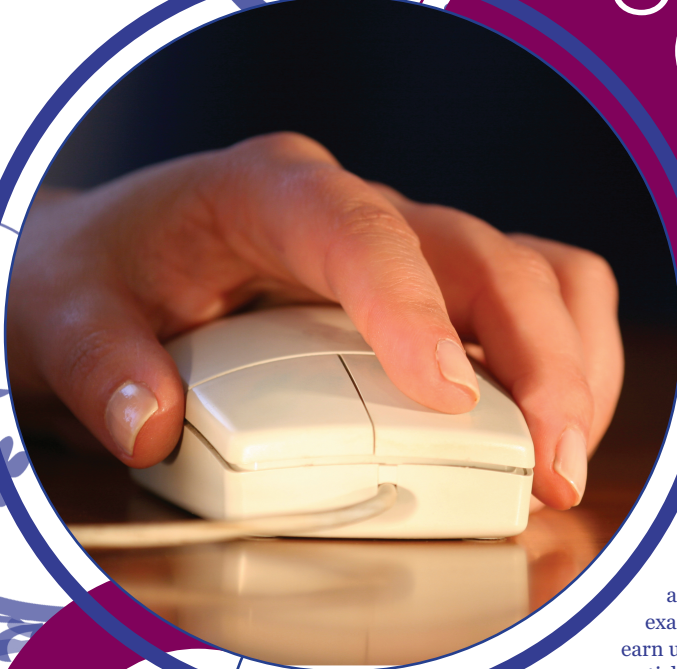

Brief companion exams are created for three of the most influential articles from each issue. By reading the articles and completing the online exams, you can test your knowledge and earn up to 1 AMA PRA Category 1 Credits™ per article. Correct answers are highlighted for your reference upon completion of the course; there is no minimum threshold score necessary for the credit. A link from the question to the correct answer in context will also be highlighted in the associated article, thus extending the learning experience.

CME credit is only provided online, and a subscription to the AJP CME program is required. From the moment you subscribe to the AJP CME program, you will be able to select from 72 courses from among 40 possible subject areas. You'll also be able to access the next 33 courses as they become available. For more information and pricing, please go to <http://cme.psychiatryonline.org/misc/aboutajpcme.shtml>

This activity is sponsored by the American Psychiatric Association. The American Psychiatric Association is accredited by the Accreditation Council for Continuing Medical Education to provide continuing medical education for physicians. The American Psychiatric Association designates this educational activity for a maximum of 1 AMA PRA Category 1 Credits™. Physicians should only claim credit commensurate with the extent of their participation in the activity.

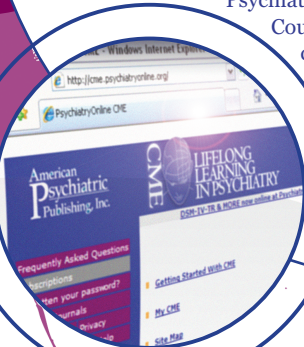

Fulfill your CME requirement while staying current on the latest advances in psychiatry.  
Subscribe to AJP CME!

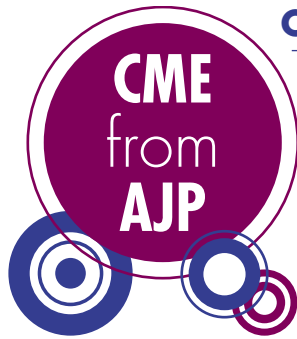

## Continuing Medical Education

Three articles in this issue form the basis of a short course with questions that can be answered for up to 1 hour of category 1 CME credit each by visiting <http://cme.psychiatryonline.org/> and clicking on “American Journal of Psychiatry CME.”

CME credit is issued only online, and a paid subscription to the AJP CME course program is required.

This month's courses appear on pages 739–742.

FREE AUDIO!

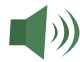

### Have You Heard?

You can listen to highlights of *The American Journal of Psychiatry* by downloading a monthly free .mp3 audio file from our web site (<http://ajp.psychiatryonline.org/misc/audio.dtl>) or by subscribing to the AJP Audio podcast at iTunes or other feed reader (e.g., NewzCrawler, FeedDemon, Bloglines, Google Reader). Presented by Deputy Editor Dr. Susan Schultz or by Editorial Director Michael Roy, each month's audio lasts approximately 30 minutes and covers several research articles, the Treatment in Psychiatry feature, and one or two editorials.

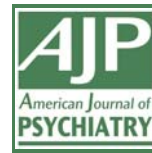

## Coming in the July 2009 issue\*

### THE AMERICAN JOURNAL OF PSYCHIATRY

*Institutional Rearing and Psychiatric Disorders in Romanian Preschool Children*

C.H. Zeanah, H.L. Egger, A.T. Smyke, C.A. Nelson, N.A. Fox, P.J. Marshall, and D. Guthrie

*The Incidence and Course of Depression in Bereaved Youth 21 Months After the Loss of a Parent to Suicide, Accident, or Sudden Natural Death*

D. Brent, N. Melhem, M.B. Donohoe, and M. Walker

*Four-Year Longitudinal Course of Children and Adolescents With Bipolar Spectrum Disorders: The Course and Outcome of Bipolar Youth (COBY) Study*

B. Birmaher, D. Axelson, B. Goldstein, M. Strober, M.K. Gill, J. Hunt, P. Houck, W. Ha, S. Iyengar, E. Kim, S. Yen, H. Hower, C. Esposito-Smythers, T. Goldstein, N. Ryan, and M. Keller

*Using Neuroplasticity-Based Auditory Training to Improve Verbal Memory in Schizophrenia*

M. Fisher, C. Holland, M.M. Merzenich, and S. Vinogradov

*Differential Expression of Metabotropic Glutamate Receptor 2 and 3 in Schizophrenia: A Mechanism for Antipsychotic Drug Action?*

S. Ghose, K.A. Gleason, B.W. Potts, K. Lewis-Amezcu, and C.A. Tamminga

\*Can't wait? Visit [ajp.psychiatryonline.org](http://ajp.psychiatryonline.org) and click the “AJP in Advance” logo to see all articles uploaded in advance of print!

# New Feature for Residents!

## The American Journal of Psychiatry Residents' Journal

A FREE electronic publication produced specifically for psychiatry residents

The Residents' Journal contains special links to full text of the articles from the current *American Journal of Psychiatry* and to AJP Audio, a downloadable MP3 file featuring highlights from the issue. In addition, this e-mail bulletin contains two exclusive features:

### Journal Club Kit

A featured article presented with an overview discussing the reasons for its selection, discussion questions, and an editorial by a senior member of the field placing the article into clinical context.

### Educational Article

Case presentation that illustrates a major point in clinical practice or highlights unique treatment approaches.

Plus lively contributions from your fellow residents:

- Instructive cases
- Unique clinical or educational programs
- Perspectives on training and career development
- Discussions arising from journal club discussions

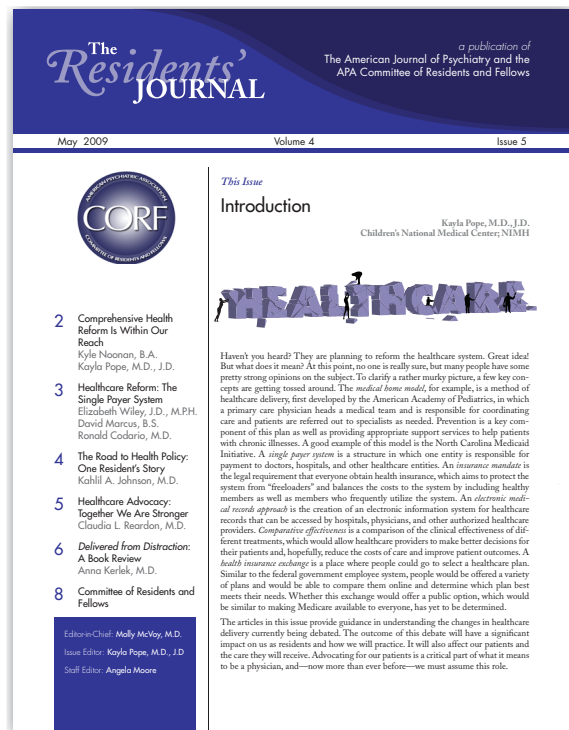

The Residents' Journal is sent free-of-charge to all psychiatry residents. Anyone interested in being included on the distribution list should contact Angela Moore, the Residents' Journal staff editor at [ajp@psych.org](mailto:ajp@psych.org) with "Subscribe to Residents' Journal" in the subject line.
